# Supplementary material
Source: MDPI journal article supplement (https://www.mdpi.com/2311-7524/10/1/80)
Supplement: s1 [file s1]

1 **Table S1.** The R value of Pearson correlation analysis among the measured parameters. \*

| Pearson correlation | Firmness | SSC    | TA     | WL     | L*     | a*     | b*     | $\Delta E^*$ | TPC |
|---------------------|----------|--------|--------|--------|--------|--------|--------|--------------|-----|
| Firmness            | 1        |        |        |        |        |        |        |              |     |
| SSC                 | 0.931    | 1      |        |        |        |        |        |              |     |
| TA                  | 0.609    | 0.423  | 1      |        |        |        |        |              |     |
| WL                  | -0.976   | -0.877 | -0.737 | 1      |        |        |        |              |     |
| L*                  | -0.980   | -0.886 | -0.734 | 0.999  | 1      |        |        |              |     |
| a*                  | -0.996   | -0.947 | -0.567 | 0.955  | 0.961  | 1      |        |              |     |
| b*                  | -0.998   | -0.919 | -0.620 | 0.979  | 0.982  | 0.992  | 1      |              |     |
| $\Delta E^*$        | -0.994   | -0.912 | -0.685 | 0.994  | 0.996  | 0.982  | 0.995  | 1            |     |
| TPC                 | 0.993    | 0.920  | 0.649  | -0.992 | -0.992 | -0.981 | -0.993 | -0.997       | 1   |

2 \* SSC: soluble solid content, TA: titratable acid, WL: weight loss, TPC: total phenolic acid content.

3

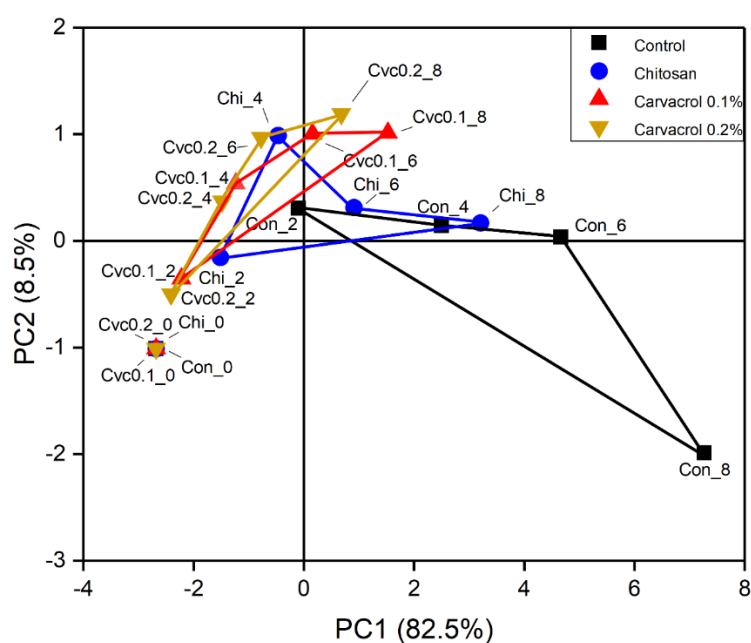

4

5 **Figure S1.** Principal component score plots containing enclosed areas of each group. Con:  
6 control; Chi: chitosan; Cvc: carvacrol. The number following the underscore indicates days  
7 after coating.
